# Supplementary material for: Electrosprayed Particles Loaded with Kartogenin as a Potential Osteochondral Repair Implant
Source: MDPI journal article supplement (doi:10.3390/polym15051275), 2023-03-02
Supplement: s1 [file s1]

## Supplementary Materials for:

# Electrosprayed particles loaded with kartogenin as a potential osteochondral repair implant

Sebastian J. Gurgul<sup>a</sup>, Anabela Moreira<sup>b</sup>, Yi Xiao<sup>a</sup>, Swastina Nath Varma<sup>c</sup>, Chaozong Liu<sup>c</sup>, Pedro Costa<sup>b</sup>, Gareth R. Williams<sup>a,\*</sup>

<sup>a</sup> UCL School of Pharmacy, University College London, 29-39 Brunswick Square, London WC1N 1AX, UK

<sup>b</sup> Biofabrics, R. Alfredo Allen 455, Porto 4200-135, Portugal

<sup>c</sup> Institute of Orthopaedic and Musculoskeletal Science, Royal National Orthopaedic Hospital, University College London, Stanmore HA7 4LP, UK

\* Correspondence: g.williams@ucl.ac.uk

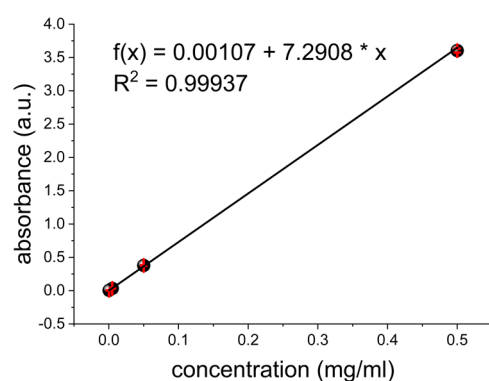

Figure S1. Calibration curve for KGN in DMF.

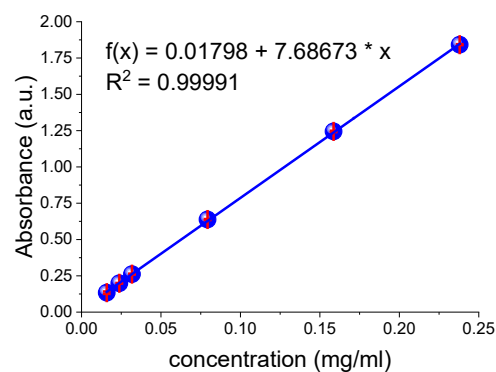

Figure S2. Calibration curve for KGN in PBS.

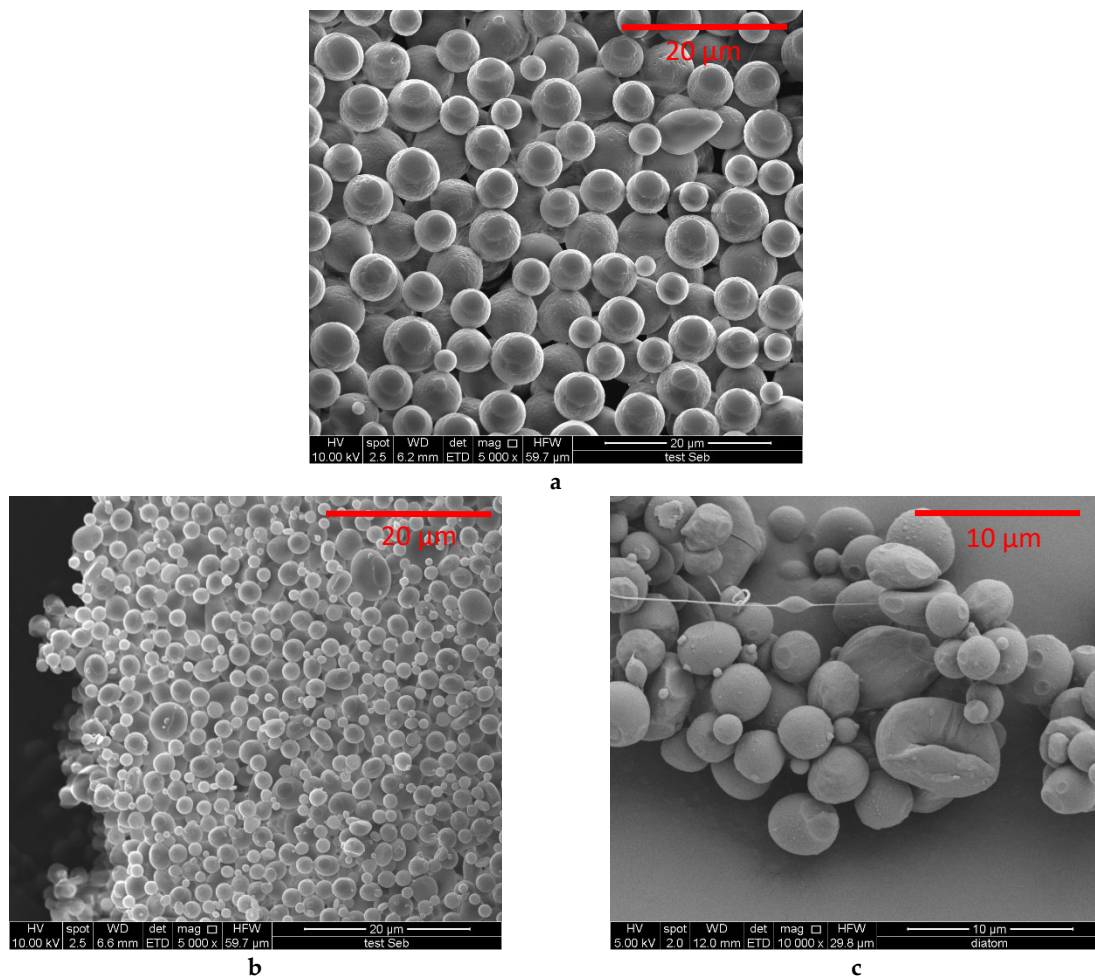

**Figure S3.** SEM images of blank (a) PLGA; (b) PLGA/PEG 30% w/w; and (c) PLGA/PVP 30% w/w particles, with no drug loading.

**Table S1.** Parameters used in the optimized electrospraying processes.

| Formulation with Kartogenin | Flow Rate (mL/h) | Tip-to-Collector Distance (cm) | Voltage (kV) |
|-----------------------------|------------------|--------------------------------|--------------|
| PLGA                        | 0.4              | 25                             | 7.0-8.6      |
| 10%PEG                      | 0.4              | 25                             | 8.25-8.4     |
| 30%PEG                      | 0.4              | 24                             | 10.5-11.0    |
| 50%PEG                      | 0.4              | 24                             | 10.5-12.0    |
| 10%PVP                      | 0.4              | 24                             | 7.0-7.8      |
| 30%PVP                      | 0.4              | 24                             | 8.0-10.6     |
| 50%PVP                      | 0.4              | 23                             | 9.2-11.6     |
| Blank formulation           | Flow rate (mL/h) | Tip-to-collector distance (cm) | Voltage (kV) |
| PLGA                        | 0.4              | 25                             | 7.2-7.9      |
| 30%PEG                      | 0.4              | 25                             | 7.1-7.2      |
| 30%PVP                      | 0.4              | 24                             | 7.2-8.4      |

**Table S2.** Composition, encapsulation efficiency and drug loading of the KGN-containing particles (n=3).

| <b>Sample</b> | <b>PLGA<br/>(% w/w)</b> | <b>PEG<br/>(% w/w)</b> | <b>PVP<br/>(% w/w)</b> | <b>Drug Loading<br/>(% w/w)</b> | <b>Encapsulation Ef-<br/>ficiency (%)</b> |
|---------------|-------------------------|------------------------|------------------------|---------------------------------|-------------------------------------------|
| PLGA          | 96.8                    | 0                      | 0                      | 3.2 ± 0.2                       | 98 ± 1                                    |
| 10% PEG       | 87.3                    | 9.7                    | 0                      | 3.0 ± 0.1                       | 98 ± 5                                    |
| 30% PEG       | 67.9                    | 29.1                   | 0                      | 3.0 ± 0.1                       | 96 ± 1                                    |
| 50% PEG       | 48.5                    | 48.5                   | 0                      | 3.1 ± 0.0                       | 95 ± 1                                    |
| 10% PVP       | 87.3                    | 0                      | 9.7                    | 3.0 ± 0.0                       | 94 ± 1                                    |
| 30% PVP       | 67.9                    | 0                      | 29.1                   | 3.0 ± 0.1                       | 93 ± 2                                    |
| 50% PVP       | 48.5                    | 0                      | 48.5                   | 2.9 ± 0.1                       | 99 ± 1                                    |
